# Supplementary material for: Marine Fungi: A Source of Potential Anticancer Compounds
Source: PubMed Central journal article supplement (PMC5760561; doi:10.3389/fmicb.2017.02536), 2018-01-05
Supplement: Table1.pdf [file Table1.pdf]

Supplementary Table 1. Novel anticancer bioactive compounds reported from marine fungi

| Sr. No. | Crude extract/isolated metabolite  | New / Known | Known Source/ Activity                                  | Endophytic fungal strain                     | Host plant(s) (family), | Plant part or tissue<br>Locality of host plants | Cell line                           | (IC50)/Inhibition              | References             |
|---------|------------------------------------|-------------|---------------------------------------------------------|----------------------------------------------|-------------------------|-------------------------------------------------|-------------------------------------|--------------------------------|------------------------|
| 1       | Simplicilliumtides A (1) and G (3) | New         |                                                         | <i>Simplicillium obclavatum</i> EIODSF 020   | Deep Sea Sediments      | East Indian Ocean                               | HL-60, K562                         | 64.7 and 100 $\mu$ M           | Liang et al. 2016      |
| 2       | Simplicilliumtides E (2) and H (4) | New         |                                                         | <i>Simplicillium obclavatum</i> EIODSF 020   | Deep Sea Sediments      | East Indian Ocean                               | K562                                | 39.4 and 73.5 $\mu$ M          | Liang et al. 2016      |
| 3       | Acaromycin A (5)                   | New         |                                                         | <i>Acaromyces ingoldii</i> FS121             | Deep Sea Sediments      | South China Sea                                 | MCF-7, NCI-H460, SF-268, and HepG-2 | <10 $\mu$ M                    | Gao et al. 2016        |
|         | (+)-cryptosporin (6)               | Known       | Marine sediments<br><i>Streptomyces</i> sp. SCSIO 03219 | <i>Acaromyces ingoldii</i> FS121             | Deep Sea Sediments      | South China Sea                                 | MCF-7, NCI-H460, SF-268, and HepG-2 | <10 $\mu$ M                    | Gao et al. 2016        |
| 4       | Asperolide E (7)                   | New         |                                                         | <i>Aspergillus wentii</i> SD-310             | Deep Sea Sediments      | South China Sea                                 | HeLa, MCF-7, and NCI-H446           | 10.0, 11.0, and 16.0 $\mu$ M   | Li et al. 2016a        |
| 5       | Asperethers A-E (8-12)             | New         |                                                         | <i>Aspergillus wentii</i> SD-310             | Deep Sea Sediments      | South China Sea                                 | A549                                | 20, 16, 19, 17, and 20 $\mu$ M | Li et al. 2016b        |
| 6       | Circumdatin G (13)                 | Known       | Marine Derived fungi<br>No cytotoxicity                 | <i>Aspergillus westerdijkiae</i> SCSIO 05233 | Deep Sea Sediments      | South China Sea                                 | K562, HL-6                          | 25.8–44.9 $\mu$ M              | Fredimoses et al. 2015 |

|   |                                                                                            |         |                                                               |                                  |                    |                    |                                                      |                                           |                    |
|---|--------------------------------------------------------------------------------------------|---------|---------------------------------------------------------------|----------------------------------|--------------------|--------------------|------------------------------------------------------|-------------------------------------------|--------------------|
| 7 | Xanthocillin X (14),                                                                       | known / | <i>Aspergillus</i> sp. Mycotoxin / Marine cytotoxic           | <i>Penicillium commune</i> SD-44 | Deep Sea Sediments | South China Sea    | MCF-7, HepG2, NCI-H460, HeLa, DU145, and MDA-MB-231, | 12.0, 7.0, 10.0, 10.0, 8.0, and 8.0 µg/mL | Shang et al. 2012; |
| 7 | Chrysogine (15)                                                                            | known   | Terrestrial mycotoxin / Marine cytotoxic                      | <i>Penicillium commune</i> SD-44 | Deep Sea Sediments | South China Sea    | SW1990,                                              | 20.0 µg/mL                                | Zhao et al. 2012   |
| 7 | Meleagrins (16)                                                                            | known   | Terrestrial mycotoxin / Marine cytotoxic                      | <i>Penicillium commune</i> SD-44 | Deep Sea Sediments | South China Sea    | DU145, HepG2, NCIH460, HeLa, and MDA-MB-231          | 5.0, 12.0, 22.0, 20.0, and 11.0 µg/mL     | Zhao et al. 2012   |
| 8 | Compound (17)                                                                              | New     |                                                               | <i>Penicillium</i> sp. PR19 N-1  | Deep Sea Sediments | Antarctic deep-sea | HL-60, A-549                                         | 28.3–45.8 µM                              | Lin et al. 2014    |
| 8 | Eremofortine C (18)                                                                        | New     |                                                               | <i>Penicillium</i> sp. PR19 N-1  | Deep Sea Sediments | Antarctic deep-sea | HL-60, A-549                                         | 5.2–82.8 µM                               |                    |
| 9 | Aspiketolactonol (19), Aspilactonols A–F (20–25), Aspyronol (26), and Epiaspinonediol (27) | New     |                                                               | <i>Aspergillus</i> sp. 16-02-1   | Deep-sea sediment  | Pacific Ocean      | K562, HL-60, HeLa, and BGC-823                       | -                                         | Chen et al. 2014b  |
|   | (S)-2-(2'-hydroxyethyl)-4-methyl-γ-butyrolactone (28),                                     | Known   | Plant <i>Annona muricata</i> not cytotoxic / marine cytotoxic | <i>Aspergillus</i> sp. 16-02-1   | Deep-sea sediment  | Pacific Ocean      | K562, HL-60, HeLa, and BGC-823                       | -                                         | Chen et al. 2014b  |
|   | Dihydroaspyrone (29),                                                                      | Known   | Marine not cytotoxic                                          | <i>Aspergillus</i> sp. 16-02-1   | Deep-sea sediment  | Pacific Ocean      | K562, HL-60, HeLa, and BGC-823                       | -                                         | Chen et al. 2014b  |

|    |                                                                     |       |                                                                                   |                                     |                   |                        |                                |                       |                   |
|----|---------------------------------------------------------------------|-------|-----------------------------------------------------------------------------------|-------------------------------------|-------------------|------------------------|--------------------------------|-----------------------|-------------------|
|    | Aspinotriol A ( <b>30</b> ),                                        | Known | Marine not cytotoxic                                                              | <i>Aspergillus</i> sp. 16-02-1      | Deep-sea sediment | Pacific Ocean          | K562, HL-60, HeLa, and BGC-823 | -                     | Chen et al. 2014b |
|    | Aspinotriol B ( <b>31</b> ),                                        | Known | Marine not cytotoxic                                                              | <i>Aspergillus</i> sp. 16-02-1      | Deep-sea sediment | Pacific Ocean          | K562, HL-60, HeLa, and BGC-823 | -                     | Chen et al. 2014b |
|    | Chaetoquadrin F ( <b>32</b> ),                                      | Known | Terrestrial / Marine cytotoxic                                                    | <i>Aspergillus</i> sp. 16-02-1      | Deep-sea sediment | Pacific Ocean          | K562, HL-60, HeLa, and BGC-823 | -                     | Chen et al. 2014b |
|    | cyclo(D-Pro-D-Phe) ( <b>33</b> ),                                   | Known | Marine bacteria no cytotoxic                                                      | <i>Aspergillus versicolor</i> ZBY-3 | Deep-sea sediment | South east Pacific sea | K562                           | IR% 54.6 at 100 µg/mL | Dong et al. 2014  |
|    | cyclo(D-Tyr-D-Pro) ( <b>34</b> ),                                   | Known | Isolated from a natural source no cytotoxic                                       | <i>Aspergillus versicolor</i> ZBY-3 | Deep-sea sediment | South east Pacific sea | K562                           | IR% 72.9 at 100 µg/mL | Dong et al. 2014  |
| 10 | phenethyl 5-oxo-L-prolinate ( <b>35</b> ),                          | New   |                                                                                   | <i>Aspergillus versicolor</i> ZBY-3 | Deep-sea sediment | South east Pacific sea | K562                           | IR% 23.5 at 100 µg/mL | Dong et al. 2014  |
|    | cyclo(L-Ile-L-Pro) ( <b>36</b> ),                                   | Known | From bacteria not cytotoxic                                                       | <i>Aspergillus versicolor</i> ZBY-3 | Deep-sea sediment | South east Pacific sea | K562                           | IR% 29.6 at 100 µg/mL | Dong et al. 2014  |
|    | cyclo(L-Leu-L-Pro) ( <b>37</b> ),                                   | Known | From endophytic actinomycetes (cytotoxic), <i>Phellinus igniarius</i> (cytotoxic) | <i>Aspergillus versicolor</i> ZBY-3 | Deep-sea sediment | South east Pacific sea | K562                           | IR% 30.9 at 100 µg/mL | Dong et al. 2014  |
|    | 3β,5α,9α-trihydroxy-(22E,24R)-ergosta-7,22-dien-6-one ( <b>38</b> ) | known | Mushroom <i>Armillaria lueo-virens</i> , Not cytotoxic                            | <i>Aspergillus versicolor</i> ZBY-3 | Deep-sea sediment | South east Pacific sea | K562                           | IR% 51.1 at 100 µg/mL | Dong et al. 2014  |

|    |                                              |       |                                                           |                                             |                             |                 |                                                                |                                        |                  |
|----|----------------------------------------------|-------|-----------------------------------------------------------|---------------------------------------------|-----------------------------|-----------------|----------------------------------------------------------------|----------------------------------------|------------------|
| 11 | Engyodontiumones H (39)                      | New   | Soil sample ,<br><i>Aspergillus</i> sp.<br>Y80118         | <i>Engyodontium album</i> DFFSCS021         | Deep-sea sediment           | South China Sea | U937                                                           | 4.9 $\mu$ M                            | Yao et al. 2014  |
|    | Polyketides- AGI-B4 (40)                     | known | Soil sample ,<br><i>Aspergillus</i> sp.<br>Y80118         | <i>Engyodontium album</i> DFFSCS021         | Deep-sea sediment           | South China Sea | U937                                                           | 8.8 $\mu$ M                            | Yao et al. 2014  |
| 11 | Compound (41)                                | New   |                                                           | <i>Penicillium</i> sp. PR19N-1              | Antarctic deep-sea sediment | Antarctic       | HL-60 and A549                                                 | 11.8 $\pm$ 0.2, 12.2 $\pm$ 0.1 $\mu$ M | Wu et al. 2013   |
| 12 | Wentilactone A (42)                          | Known | <i>Aspergillus wentii</i> Wehmer (NRRL 6435) from peanuts | <i>Aspergillus dimorphicus</i> SD317        | Deep-sea sediment           | South China Sea | Induce apoptosis and G2/M arrest of human lung carcinoma cells |                                        | Xu et al. 2015   |
|    | Wentilactone B (43)                          | Known | <i>Aspergillus wentii</i> Wehmer (NRRL 6435) from peanuts | <i>Aspergillus dimorphicus</i> SD317        | Deep-sea sediment           | South China Sea | Induce apoptosis and G2/M arrest of human lung carcinoma cells |                                        | Xu et al. 2015   |
| 13 | Compound (44), Compound (45), Compound (46), | known | Terrestrial than marine                                   | <i>Paecilomyces lilacinus</i> ZBY-1         | Deep Sea                    | South China Sea | K562, MCF-7, HL-60, and BGC-823                                | 22.3-139.0 $\mu$ M                     | Cui et al. 2013  |
|    | Cerebroside A-D (47-50)                      | known | Terrestrial than marine                                   | <i>Paecilomyces lilacinus</i> ZBY-1         | Deep Sea                    | South China Sea | K562, MCF-7, HL-60, and BGC-823                                | 22.3-139.0 $\mu$ M                     | Cui et al. 2013  |
| 14 | 5-Chlorosclerotiamide (51),                  | New   |                                                           | <i>Aspergillus westerdijkiae</i> DFFSC S013 | Deep-sea sediment           | South China Sea | K562                                                           | 44 $\mu$ M                             | Peng et al. 2013 |
|    | 10-epi-sclerotiamide (52)                    | New   |                                                           | <i>Aspergillus westerdijkiae</i> DFFSC S014 | Deep-sea sediment           | South China Sea | K563                                                           | 53 $\mu$ M                             | Peng et al. 2013 |

|    |                      |       |                                             |                                            |                                                 |                                |                                       |                                    |                   |
|----|----------------------|-------|---------------------------------------------|--------------------------------------------|-------------------------------------------------|--------------------------------|---------------------------------------|------------------------------------|-------------------|
| 15 | Luteoalbusin A (53), | New   |                                             | <i>Acrostalagmus luteoalbus</i> SCSIO F457 | Deep-sea sediment                               | South China Sea                | SF-268<br>MCF-7<br>NCI-H460<br>HepG-2 | 0.46 , 0.23 ,<br>1.15 , 0.91<br>µM | Wang et al. 2012  |
|    | Luteoalbusin B (54)  | New   |                                             | <i>Acrostalagmus luteoalbus</i> SCSIO F458 | Deep-sea sediment                               | South China Sea                | SF-268<br>MCF-7<br>NCI-H460<br>HepG-2 | 0.59 , 0.25 ,<br>1.29 µM           | Wang et al. 2012  |
|    | T988A (55)           | known | Terrestrial Cytotoxic /Marine cytotoxic     | <i>Acrostalagmus luteoalbus</i> SCSIO F459 | Deep-sea sediment                               | South China Sea                | SF-268<br>MCF-7<br>NCI-H460<br>HepG-2 | Range of 0.91 to 17.78 µM          | Wang et al. 2012  |
|    | Gliocladine C (56)   | known | Terrestrial / Marine cytotoxic              | <i>Acrostalagmus luteoalbus</i> SCSIO F460 | Deep-sea sediment                               | South China Sea                | SF-268<br>MCF-7<br>NCI-H460<br>HepG-2 | Range of 0.91 to 17.78 µM          | Wang et al. 2012  |
|    | Gliocladine D (57)   | known | Terrestrial / Marine cytotoxic              | <i>Acrostalagmus luteoalbus</i> SCSIO F461 | Deep-sea sediment                               | South China Sea                | SF-268<br>MCF-7<br>NCI-H460<br>HepG-2 | Range of 0.91 to 17.78 µM          | Wang et al. 2012  |
| 16 | Brevione I-(58),     | New   |                                             | <i>Penicillium</i> sp                      | Deep Sea Sediments                              | East Pacific Ocean             | MCF-7                                 | 7.44                               | Li et al. 2012    |
|    | Brevione A (59)      | known | Terrestrial No cytotoxic / Marine cytotoxic | <i>Penicillium</i> sp                      | Deep Sea Sediments                              | East Pacific Ocean             | MCF-7                                 | 28.4 µM                            | Li et al. 2012    |
|    | Brevione I-(58),     | New   |                                             | <i>Penicillium</i> sp                      | Deep Sea Sediments                              | East Pacific Ocean             | A549                                  | 32.5 µM                            | Li et al. 2012    |
| 17 | Varioloid A (60),    | New   |                                             | <i>Paecilomyces variotii</i> EN-291        | <i>Grateloupia turuturu</i> , a marine red alga | Coast of Qingdao, P. R. China, | A549,<br>HCT116,<br>HepG2             | Range of 2.6 - 8.2 µg/mL           | Zhang et al. 2016 |
|    | Varioloid B (61)     | New   |                                             | <i>Paecilomyces variotii</i> EN-291        | <i>Grateloupia turuturu</i> , a marine red alga | Coast of Qingdao, P. R. China, | A549,<br>HCT116,<br>HepG2             | Range of 2.6 - 8.2 µg/mL           | Zhang et al. 2016 |

|    |                                                                              |       |                                               |                                       |                                              |                                               |                                                                        |                                                                                                                                                                   |                        |
|----|------------------------------------------------------------------------------|-------|-----------------------------------------------|---------------------------------------|----------------------------------------------|-----------------------------------------------|------------------------------------------------------------------------|-------------------------------------------------------------------------------------------------------------------------------------------------------------------|------------------------|
| 18 | 6 $\beta$ ,9 $\alpha$ -dihydroxy-14-p-nitrobenzoylcinnamolide ( <b>62</b> ), | New   |                                               | <i>Aspergillus ochraceus</i> Jcma1F17 | Marine alga <i>Coelarthrum</i> sp.           | Paracel Islands, South China Sea              | H1975, U937, K562, BGC-823, Molt-4, MCF-7, A549, HeLa, HL60, and Huh-7 | Range of 1.95 to 6.35 $\mu$ M                                                                                                                                     | Fang et al. 2014       |
| 18 | Insulicolide A ( <b>63</b> )                                                 | known | Terrestrial / Marine cytotoxic                | <i>Aspergillus ochraceus</i> Jcma1F17 | Marine alga <i>Coelarthrum</i> sp.           | Paracel Islands, South China Sea              | H1975, U937, K562, BGC-823, Molt-4, MCF-7, A549, HeLa, HL60, and Huh-7 | Range of 1.95 to 6.35 $\mu$ M                                                                                                                                     | Fang et al. 2014       |
| 19 | Physcion ( <b>64</b> )                                                       | known | Both terrestrial and marine sources Cytotoxic | <i>Microsporium</i> sp.               | Marine red alga <i>Lomentaria catenata</i> , | Guryongpo, NamGu, PoHang in Republic of Korea | HeLa                                                                   | Induces apoptotic cell death in HeLa cells in the association with activating expressions of caspase family enzymes and p53 followed by Bax and Bcl-2 regulation. | Wijesekara et al. 2014 |

|    |                                     |        |                                                                  |                                 |                                              |                                               |                                                                 |                                                                                                                                          |                        |
|----|-------------------------------------|--------|------------------------------------------------------------------|---------------------------------|----------------------------------------------|-----------------------------------------------|-----------------------------------------------------------------|------------------------------------------------------------------------------------------------------------------------------------------|------------------------|
| 20 | Neoechinulin A (65)                 | Known  | /Marine derived fungi                                            | <i>Microsporium</i> sp.         | Marine red alga <i>Lomentaria catenata</i> , | Guryongpo, NamGu, PoHang in Republic of Korea | HeLa Cell lines                                                 | Induce cell apoptosis through down-regulating of Bcl-2 expression, up-regulating of Bax expression, and activating the caspase-3 pathway | Wijesekara et al. 2013 |
| 21 | Asperolide A B (66, 67)             | New    |                                                                  | <i>Aspergillus wentii</i> EN-48 | <i>Sargassum</i> sp                          | China Sea                                     | HeLa, HepG2, MCF-7, MDA-MB-231, NCI-H460, SMMC-7721, and SW1990 | Moderate activity. In the range of 28 - 97 $\mu$ M                                                                                       | Sun et al. 2012        |
|    | Tetranorditerpenoid derivative (68) | known  | Terrestrial Fungus <i>Sclerotinia homoeocarpa</i> , no cytotoxic | <i>Aspergillus wentii</i> EN-48 | <i>Sargassum</i> sp                          | China Sea                                     | HeLa, HepG2, MCF-7, MDA-MB-231, NCI-H460, SMMC-7721, and SW1990 | Moderate activity In the range of 28 - 97 $\mu$ M                                                                                        | Sun et al. 2012        |
|    | Wentilactone A (42)                 | Known, | <i>Aspergillus wentii</i> Wehmer (NRRL 6435) from peanuts        | <i>Aspergillus wentii</i> EN-48 | <i>Sargassum</i> sp                          | China Sea                                     | HeLa, HepG2, MCF-7, MDA-MB-231, NCI-H460, SMMC-7721, and SW1990 | Moderate activity In the range of 28 - 97 $\mu$ M                                                                                        | Sun et al. 2012        |

|    |                                       |       |                                                           |                                        |                                           |                            |                                                                 |                                                   |                   |
|----|---------------------------------------|-------|-----------------------------------------------------------|----------------------------------------|-------------------------------------------|----------------------------|-----------------------------------------------------------------|---------------------------------------------------|-------------------|
|    | Wentilactone B<br>(43)                | Known | <i>Aspergillus wentii</i> Wehmer (NRRL 6435) from peanuts | <i>Aspergillus wentii</i> EN-48        | <i>Sargassum</i> sp                       | China Sea                  | HeLa, HepG2, MCF-7, MDA-MB-231, NCI-H460, SMMC-7721, and SW1990 | Moderate activity In the range of 28 - 97 $\mu$ M | Sun et al. 2012   |
|    | Wentilactoneand B<br>(43)             | Known | <i>Aspergillus wentii</i> Wehmer (NRRL 6435) from peanuts | <i>Aspergillus wentii</i> EN-48        | <i>Sargassum</i> sp                       | China Sea                  | HeLa, HepG2, MCF-7, MDA-MB-231, NCI-H460, SMMC-7721, and SW1990 | 17 $\mu$ M                                        | Sun et al. 2012   |
| 22 | Spirobrocazines C<br>(69)             | New   |                                                           | <i>Penicillium brocae</i> MA-231       | Mangrove plant<br><i>Avicennia marina</i> | Hainan Island, P. R. China | A2780                                                           | 59 $\mu$ M                                        | Meng et al. 2016  |
|    | Brocazine G (70)                      | New   |                                                           | <i>Penicillium brocae</i> MA-231       | Mangrove plant<br><i>Avicennia marina</i> | Hainan Island, P. R. China | A2780 and A2780 CisR                                            | 664 nM , 661 nM                                   | Meng et al. 2016  |
| 23 | 2,4-Dihydroxy-6-nonylbenzoate<br>(71) | known | Merine cytotoxic                                          | <i>Lasiodiplodia</i> sp. 318           | <i>Excoecaria agallocha</i>               | Guangdong Province, China  | MMQ, GH3                                                        | 5.29 $\mu$ M, 13.05 $\mu$ M                       | Huang et al. 2017 |
| 24 | Chloropreussomerins A and B (72,73)   | New   |                                                           | <i>Lasiodiplodia theobromae</i> ZJ-HQ1 | <i>Acanthus ilicifolius</i>               | Guangdong Province, China  | A549 and MCF-7                                                  | Range of 5.9-8.9 $\mu$ M                          | Chen et al. 2016  |
|    | preussomerin K (74),                  | known | Endophytic fungus no cytotoxic                            | <i>Lasiodiplodia theobromae</i> ZJ-HQ1 | <i>Acanthus ilicifolius</i>               | Guangdong Province, China  | A549, HepG2, MCF-7                                              | Range of 2.5-9.4 $\mu$ M                          | Chen et al. 2016  |



|    |                                                                |       |                                                                                                              |                                        |                              |                           |                    |                                |                                                          |
|----|----------------------------------------------------------------|-------|--------------------------------------------------------------------------------------------------------------|----------------------------------------|------------------------------|---------------------------|--------------------|--------------------------------|----------------------------------------------------------|
|    | Preussomerin H (75)                                            | known | Endophytes no cytotoxic                                                                                      | <i>Lasiodiplodia theobromae</i> ZJ-HQ1 | <i>Acanthus ilicifolius</i>  | Guangdong Province, China | A549, HepG2, MCF-7 | Range of 2.5-9.4 $\mu$ M       | Chen et al. 2016                                         |
|    | Preussomerin G (76)                                            | known | Corprophilus fungus <i>Preussia isomera</i> and the endophytic fungus <i>Harmonema dematioides</i> cytotoxic | <i>Lasiodiplodia theobromae</i> ZJ-HQ1 | <i>Acanthus ilicifolius</i>  | Guangdong Province, China | A549, HepG2, MCF-7 | Range of 2.5-9.4 $\mu$ M       | Chen et al. 2016                                         |
|    | Preussomerin F (77)                                            | known | Coporophilous fungus no cytotoxic                                                                            | <i>Lasiodiplodia theobromae</i> ZJ-HQ1 | <i>Acanthus ilicifolius</i>  | Guangdong Province, China | A549, HepG2, MCF-7 | Range of 2.5-9.4 $\mu$ M       | Chen et al. 2016                                         |
| 25 | 7-O-methylnigrosporolide (78)<br>Pestalotioprolide D-F (79-81) | New   |                                                                                                              | <i>Pestalotiopsis microspore</i>       | <i>Drepanocarpus lunatus</i> | Cameroon                  | L5178Y, A2780      | 0.7, 5.6, 3.4, and 3.9 $\mu$ M | Liu et al. 2016                                          |
|    | Pestalotioprolide E (80)                                       | New   |                                                                                                              | <i>Pestalotiopsis microspore</i>       | <i>Drepanocarpus lunatus</i> | Cameroon                  | A2780              | 1.2 $\mu$ M                    | Liu et al. 2016                                          |
| 26 | Campyridone D (82)                                             | New   |                                                                                                              | <i>Campylocarpon</i> sp. HDN13-307     | <i>Sonneratia caseolaris</i> | PR China                  | HeLa               | 8.8 $\mu$ M                    | Zhu et al. 2016                                          |
|    | Illicicolin H (83)                                             | Known | Terrestrial / Marine cytotoxic                                                                               | <i>Campylocarpon</i> sp. HDN13-307     | <i>Sonneratia caseolaris</i> | PR China                  | HeLa               | 4.7 $\mu$ M                    | Zhu et al. 2016                                          |
| 27 | Dihydroaltersolanol C (84),                                    | New   |                                                                                                              | <i>Stemphylium globuliferum</i>        | <i>Avicennia marina</i>      | Hurghada in Egypt         | L5178Y             | 3.4 $\mu$ M                    | Moussa et al. 2016, Liu et al. 2015, Debbab, et al. 2012 |
|    | Altersolanol A (85),                                           | known | Terrestrial, Cytotoxic Endophytes                                                                            | <i>Stemphylium globuliferum</i>        | <i>Avicennia marina</i>      | Hurghada in Egypt         | L5178Y             | 2.53 $\mu$ M                   | Moussa et al. 2016, Liu et al. 2015,                     |

|    |                                                              |       |                                          |                                  |                           |                      |        |                                         |                                                          |
|----|--------------------------------------------------------------|-------|------------------------------------------|----------------------------------|---------------------------|----------------------|--------|-----------------------------------------|----------------------------------------------------------|
|    |                                                              |       |                                          |                                  |                           |                      |        |                                         | Debbab, et al. 2012                                      |
|    | Altersolanol B ( <b>86</b> )                                 | known | Terrestrial, Cytotoxic Endophytes        | <i>Stemphylium globuliferum</i>  | <i>Avicennia marina</i>   | Hurghada in Egypt    | L5178Y | 3.78 $\mu$ M                            | Moussa et al. 2016, Liu et al. 2015, Debbab, et al. 2012 |
|    | Alterporriol E ( <b>88</b> ),                                | New   |                                          | <i>Stemphylium globuliferum</i>  | <i>Avicennia marina</i>   | Hurghada in Egypt    | L5178Y | 6.9 $\mu$ M                             | Moussa et al. 2016, Liu et al. 2015, Debbab, et al. 2012 |
|    | Altersolanol N ( <b>87</b> )                                 | known | Terrestrial, Cytotoxic Endophytes        | <i>Stemphylium globuliferum</i>  | <i>Avicennia marina</i>   | Hurghada in Egypt    | L5178Y | Low micromolar range ( % growth - 1.4 ) | Moussa et al. 2016, Liu et al. 2015, Debbab, et al. 2012 |
| 28 | Rhizovarins A, B, E (89, 90, 91),                            | New   |                                          | <i>Mucor irregularis</i> QEN-189 | <i>Rhizophora stylosa</i> | Hainan Island, China | A-549  | 11.5, 6.3, and 9.2 , $\mu$ M            | Gao et al. 2016                                          |
|    | Penitrems A,C F ( <b>92,93,94</b> ),                         | known | Terrestrial mycotoxin / Marine cytotoxic | <i>Mucor irregularis</i> QEN-189 | <i>Rhizophora stylosa</i> | Hainan Island, China | A-549  | 8.4, 8.0, and 8.2 $\mu$ M               | Gao et al. 2016                                          |
|    | 3 $\beta$ -hydroxy- 4 $\beta$ -desoxypaxilline ( <b>95</b> ) | known | Marine cytotoxic                         | <i>Mucor irregularis</i> QEN-189 | <i>Rhizophora stylosa</i> | Hainan Island, China | A-549  | 4.6 $\mu$ M                             | Gao et al. 2016                                          |
|    | Rhizovarin A B ( <b>89,90</b> ),                             | New   |                                          | <i>Mucor irregularis</i> QEN-189 | <i>Rhizophora stylosa</i> | Hainan Island, China | HL-60  | 9.6, 5.0, $\mu$ M                       | Gao et al. 2016                                          |
|    | Penitrems A,C F ( <b>92,93,94</b> ),                         | known | Terrestrial mycotoxin / Marine cytotoxic | <i>Mucor irregularis</i> QEN-189 | <i>Rhizophora stylosa</i> | Hainan Island, China | HL-60  | 7.0,4.7, 3.3 $\mu$ M                    | Gao et al. 2016                                          |

|    |                                                                                                   |       |                                                                     |                                  |                                     |                                       |                                       |                                            |                         |
|----|---------------------------------------------------------------------------------------------------|-------|---------------------------------------------------------------------|----------------------------------|-------------------------------------|---------------------------------------|---------------------------------------|--------------------------------------------|-------------------------|
|    | 3 $\beta$ -hydroxy- 4 $\beta$ -desoxy-paxilline (95)                                              | known | Known / Marine cytotoxic                                            | <i>Mucor irregularis</i> QEN-189 | <i>Rhizophora stylosa</i>           | Hainan Island, China                  | HL-61                                 | 2.6 $\mu$ M                                | Gao et al. 2016         |
| 29 | Pestalpolyol I (96)                                                                               | New   |                                                                     | <i>Pestalotiopsis clavispora</i> | <i>Rhizophora harrisonii</i>        | Port Harcourt (Nigeria)               | L5178Y                                | 4.10 $\mu$ M                               | Perez et al. 2016       |
| 30 | Rhytidchromones A, B,C and E, (97,98,99,100)                                                      | New   |                                                                     | <i>Rhytidhysteron rufulum</i>    | <i>Bruguiera gymnorrhiza</i>        | Prachuab Kiri Khan Province, Thailand | Kato-3                                | 16.0 to 23.3 $\mu$ M                       | Chokpaiboon et al. 2016 |
|    | Rhytidchromones A, C (97, 99)                                                                     | New   |                                                                     | <i>Rhytidhysteron rufulum</i>    | <i>Bruguiera gymnorrhiza</i>        | Prachuab Kiri Khan Province, Thailand | MCF-7                                 | 19.3 and 17.7 $\mu$ M                      | Chokpaiboon et al. 2016 |
| 31 | Ethyl-2,4-dihydroxy-6-(80 -hydroxynonyl)-benzoate (101)                                           | New   |                                                                     | <i>Lasiodiplodia</i> sp. 318     | <i>Excoecaria agallocha</i>         | Guangdong Province, China             | MDA-MB-435, HepG2,HCT-116, A549, THP1 | 10.13, 12.50, 11.92, 13.31 , 39.74 $\mu$ M | Li et al. 2016c         |
| 32 | Beauvericin (102)                                                                                 | Known | Terrestrial No cytotoxic , Marine cytotoxic                         | <i>Fusarium</i> sp. (No. DZ27)   | Mangrove-derived endophytic fungus  | South China Sea                       | KB and KBv200                         | 5.76 $\pm$ 0.55, 5.34 $\pm$ 0.09 $\mu$ M   | Tao et al. 2015         |
| 33 | 4-(2',3'-dihydroxy-3'-methyl-butanoxy)-phenethanol (103)                                          | New   |                                                                     | <i>Penicillium</i> sp.FJ-1       | <i>Avicennia marina</i>             | Fujian, China                         | Tca8113 and MG-63                     | 26 , 35 $\mu$ M                            | Zheng et al. 2014       |
| 33 | 15- hydroxy-6 $\alpha$ ,12-epoxy-7 $\beta$ ,10 $\alpha$ H,11 $\beta$ H-spiroax-4-ene-12-one (104) | New   |                                                                     | <i>Penicillium</i> sp.FJ-2       | <i>Avicennia marina</i>             | Fujian, China                         | Tca8113, WRL-68, MG-63                | 10, 58 $\mu$ M, 55 nM                      | Zheng et al. 2014       |
| 34 | 3,4-seco-sonderianol (105)                                                                        | Known | <i>Trigonostemon chinensis</i> plant antimicrobial Marine cytotoxic | Endophytic fungus J3             | Mangrove plant <i>Ceriops tagal</i> | Hainan province, China                | K562, SGC-7901, BEL-7402              | 9.2 , 15.7 , 25.4 $\mu$ g/mL               | Zeng et al. 2015        |

|    |                        |       |                                                              |                            |                               |                          |                                     |              |                           |
|----|------------------------|-------|--------------------------------------------------------------|----------------------------|-------------------------------|--------------------------|-------------------------------------|--------------|---------------------------|
| 35 | Waal A (106),          | known | Terrestrial No cytotoxic ,<br>Marine cytotoxic               | <i>Acremonium strictum</i> | <i>Rhizophora apiculata</i>   | Island of CatBa, Vietnam | human cisplatin-sensitive, A2780    | 27.1 $\mu$ M | Hammerschmidt et al. 2014 |
|    | Pestalotiopene A (107) | known | Mangroove fungi, week cytotoxic ,<br>Marine cytotoxic        | <i>Acremonium strictum</i> | <i>Rhizophora apiculata</i>   | Island of CatBa, Vietnam | human cisplatin-sensitive, A2780    | 76.2 $\mu$ M | Hammerschmidt et al. 2014 |
|    | Cytosporone E (108)    | known | Endophytic fungi<br>Cytospor, Marine cytotoxic               | <i>Acremonium strictum</i> | <i>Rhizophora apiculata</i>   | Island of CatBa, Vietnam | human cisplatin-sensitive, A2780    | 8.3 $\mu$ M  | Hammerschmidt et al. 2014 |
|    | Waal A (106),          | known | Terrestrial, Marine cytotoxic                                | <i>Acremonium strictum</i> | <i>Rhizophora apiculata</i>   | Island of CatBa, Vietnam | human cisplatin-Resistant Resistant | 12.6 $\mu$ M | Hammerschmidt et al. 2014 |
|    | Pestalotiopene A (107) | known | Mangroove fungi, week cytotoxic ,<br>Marine cytotoxic        | <i>Acremonium strictum</i> | <i>Rhizophora apiculata</i>   | Island of CatBa, Vietnam | human cisplatin-Resistant Resistant | 30.1 $\mu$ M | Hammerschmidt et al. 2014 |
|    | Cytosporone E (108)    | known | Endophytic fungi<br>Cytospor, Marine cytotoxic               | <i>Acremonium strictum</i> | <i>Rhizophora apiculata</i>   | Island of CatBa, Vietnam | human cisplatin-Resistant Resistant | 19.0 $\mu$ M | Hammerschmidt et al. 2014 |
| 36 | Dothiorelone F (109),  | New   |                                                              | <i>Dothiorella</i> sp.     | <i>Aegiceras corniculatum</i> | Fujian Province of China | Raji cancer                         | 2 $\mu$ g/mL | Du et al. 2014            |
|    | Dothiorelone G (110)   | Known | (Cytospore B)<br>Endophyte plant not identified No cytotoxic | <i>Dothiorella</i> sp.     | <i>Aegiceras corniculatum</i> | Fujian Province of China | Raji cancer                         | 2 $\mu$ g/mL | Du et al. 2014            |

|    |                                                                                                            |       |                                             |                                         |                                     |                 |          |              |                   |
|----|------------------------------------------------------------------------------------------------------------|-------|---------------------------------------------|-----------------------------------------|-------------------------------------|-----------------|----------|--------------|-------------------|
| 37 | 3 $\beta$ ,5 $\alpha$ -dihydroxy-(22 <i>E</i> ,24 <i>R</i> )-ergosta-7,22-dien-6-one (111),                | Known | Fist time ntural source                     | <i>Aspergillus terreus</i> (No. GX7-3B) | <i>Bruguiera gymnoihiza</i> (Linn.) | South China Sea | MCF-7,   | 4.98 $\mu$ M | Deng et al. 2013a |
|    | 3 $\beta$ ,5 $\alpha$ -dihydroxy-(22 <i>E</i> ,24 <i>R</i> )-ergosta-7,22-dien-6-one (111),                | Known | Fist time ntural source                     | <i>Aspergillus terreus</i> (No. GX7-3B) | <i>Bruguiera gymnoihiza</i> (Linn.) | South China Sea | A549,    | 1.95 $\mu$ M | Deng et al. 2013a |
|    | 3 $\beta$ ,5 $\alpha$ -dihydroxy-(22 <i>E</i> ,24 <i>R</i> )-ergosta-7,22-dien-6-one (111),                | Known | Fist time ntural source                     | <i>Aspergillus terreus</i> (No. GX7-3B) | <i>Bruguiera gymnoihiza</i> (Linn.) | South China Sea | Hela and | 0.68 $\mu$ M | Deng et al. 2013a |
|    | 3 $\beta$ ,5 $\alpha$ -dihydroxy-(22 <i>E</i> ,24 <i>R</i> )-ergosta-7,22-dien-6-one (111),                | Known | Fist time ntural source                     | <i>Aspergillus terreus</i> (No. GX7-3B) | <i>Bruguiera gymnoihiza</i> (Linn.) | South China Sea | KB       | 1.50 $\mu$ M | Deng et al. 2013a |
|    | Beauvericin (102)                                                                                          | Known | Terrestrial cytotoxic , Marine cytotoxic    | <i>Aspergillus terreus</i> (No. GX7-3B) | <i>Bruguiera gymnoihiza</i> (Linn.) | South China Sea | MCF-7,   | 2.02 $\mu$ M | Deng et al. 2013a |
|    | Beauvericin (102)                                                                                          | Known | Terrestrial cytotoxic , Marine cytotoxic    | <i>Aspergillus terreus</i> (No. GX7-3B) | <i>Bruguiera gymnoihiza</i> (Linn.) | South China Sea | A549,    | 0.82 $\mu$ M | Deng et al. 2013a |
|    | Beauvericin (102)                                                                                          | Known | Terrestrial cytotoxic , Marine cytotoxic    | <i>Aspergillus terreus</i> (No. GX7-3B) | <i>Bruguiera gymnoihiza</i> (Linn.) | South China Sea | Hela and | 1.14 $\mu$ M | Deng et al. 2013a |
|    | Beauvericin (102)                                                                                          | Known | Terrestrial cytotoxic , Marine cytotoxic    | <i>Aspergillus terreus</i> (No. GX7-3B) | <i>Bruguiera gymnoihiza</i> (Linn.) | South China Sea | KB       | 1.10 $\mu$ M | Deng et al. 2013a |
|    | 3 $\beta$ ,5 $\alpha$ ,14 $\alpha$ -trihydroxy-(22 <i>E</i> ,24 <i>R</i> )-ergosta-7, 22-dien-6-one (112), | Known | Terrestrial No cytotoxic , Marine cytotoxic | <i>Aspergillus terreus</i> (No. GX7-3B) | <i>Bruguiera gymnoihiza</i> (Linn.) | South China Sea | MCF-7,   | 25.4 $\mu$ M | Deng et al. 2013a |

|    |                                                                                                                                    |       |                                              |                                         |                                     |                                       |                           |                  |                   |
|----|------------------------------------------------------------------------------------------------------------------------------------|-------|----------------------------------------------|-----------------------------------------|-------------------------------------|---------------------------------------|---------------------------|------------------|-------------------|
|    | 3β,5α,14α-trihydroxy-(22 <i>E</i> ,24 <i>R</i> )-ergosta-7, 22-dien-6-one (112),                                                   | Known | Terrestrial No cytotoxic , Marine cytotoxic  | <i>Aspergillus terreus</i> (No. GX7-3B) | <i>Bruguiera gymnoihiza</i> (Linn.) | South China Sea                       | A549,                     | 27.1 μM          | Deng et al. 2013a |
|    | 3β,5α,14α-trihydroxy-(22 <i>E</i> ,24 <i>R</i> )-ergosta-7, 22-dien-6-one (112),                                                   | Known | Terrestrial No cytotoxic , Marine cytotoxic  | <i>Aspergillus terreus</i> (No. GX7-3B) | <i>Bruguiera gymnoihiza</i> (Linn.) | South China Sea                       | Hela and                  | 24.4 μM          | Deng et al. 2013a |
|    | 3β,5α,14α-trihydroxy-(22 <i>E</i> ,24 <i>R</i> )-ergosta-7, 22-dien-6-one (112),                                                   | Known | Terrestrial No cytotoxic , Marine cytotoxic  | <i>Aspergillus terreus</i> (No. GX7-3B) | <i>Bruguiera gymnoihiza</i> (Linn.) | South China Sea                       | KB                        | 19.4 μM          | Deng et al. 2013a |
| 38 | Nigerasterols A (113)                                                                                                              | New   |                                              | <i>Aspergillus niger</i> MA-132         | <i>Avicennia marina</i>             | Hainan, China                         | HL60                      | 0.30 , 1.50 μM   | Liu et al. 2013   |
|    | Nigerasterol B (114)                                                                                                               | New   |                                              | <i>Aspergillus niger</i> MA-132         | <i>Avicennia marina</i>             | Hainan, China                         | A549                      | 1.82 , 5.41 μM   | Liu et al. 2013   |
| 39 | 4-(methoxymethyl)-7-methoxy-6-methyl-1(3H)-isobenzofuranone (115)                                                                  | New   |                                              | <i>Penicillium</i> sp. ZH58             | Mangrove endophytic fungus          | South China Sea                       | KB and KB <sub>v200</sub> | 6 , 10 μg/mL     | Yang et al. 2013a |
| 40 | <i>O</i> -glycoside, 3- <i>O</i> -(6- <i>O</i> - <i>L</i> -arabinopyranosyl)- <i>D</i> -glucopyranosyl-1,4-dimethoxyxanthone (116) | New   |                                              | <i>Phomopsis</i> sp. (ZH76)             | Excoecaria agallocha                | Dong Sai of the South China Sea coast | HEp-2 and HepG2           | 9 and 16 μM      | Huang et al. 2013 |
| 41 | Botryosphaerin F (117)                                                                                                             | New   |                                              | <i>Aspergillus terreus</i> (No. GX7-3B) | <i>Bruguiera gymnoihiza</i> (Linn.) | South China Sea                       | MCF-7 and HL-60           | 4.49 and 3.43 μM | Deng et al. 2013b |
|    | LLZ1271βCompound (118)                                                                                                             | Known | Endophytes No Cytotoxic / , Marine cytotoxic | <i>Aspergillus terreus</i> (No. GX7-3B) | <i>Bruguiera gymnoihiza</i> (Linn.) | South China Sea                       | MCF-7 and HL-60           | 4.49 and 3.43 μM | Deng et al. 2013b |

|    |                                                                            |       |                                                                     |                                       |                                  |                                                        |                                            |                                                                        |                        |
|----|----------------------------------------------------------------------------|-------|---------------------------------------------------------------------|---------------------------------------|----------------------------------|--------------------------------------------------------|--------------------------------------------|------------------------------------------------------------------------|------------------------|
| 42 | 5-methyl-8-(3-methylbut-2-enyl) furanocoumarin ( <b>119</b> )              | New   |                                                                     | <i>Penicillium</i> sp. ZH16           | Mangrove tree<br>Avicennia sp.   | South<br>China Sea                                     | KB and<br>KBv200                           | 5 and 10 µg/<br>mL                                                     | Huang et al.<br>2012   |
| 43 | Pullularin A ( <b>120</b> ),                                               | known | From<br>endopytes/<br>week cytotoxic                                | <i>Bionectria<br/>ochroleuca</i>      | <i>Sonneratia<br/>caseolaris</i> | China                                                  | L5178Y                                     | 0.1 to 6.7<br>µg/mL                                                    | Ebrahim et<br>al. 2012 |
|    | Pullularin C ( <b>121</b> ),                                               | known | From<br>endophytes/Cyt<br>otoxic / Marine<br>cytotoxic              | <i>Bionectria<br/>ochroleuca</i>      | <i>Sonneratia<br/>caseolaris</i> | China                                                  | L5178Y                                     | 0.1 to 6.7<br>µg/mL                                                    | Ebrahim et<br>al. 2012 |
|    | Verticillin D ( <b>122</b> ),                                              | known | Mycoparasite<br>Gliocladium<br>catenulatum /<br>Marine<br>cytotoxic | <i>Bionectria<br/>ochroleuca</i>      | <i>Sonneratia<br/>caseolaris</i> | China                                                  | L5178Y                                     | 0.1 to 6.7<br>µg/mL                                                    | Ebrahim et<br>al. 2012 |
|    | Pullularins E and F<br>( <b>123</b> , <b>124</b> )                         | New   |                                                                     | <i>Bionectria<br/>ochroleuca</i>      | <i>Sonneratia<br/>caseolaris</i> | China                                                  | L5178Y                                     | 0.1 to 6.7<br>µg/mL                                                    | Ebrahim et<br>al. 2012 |
| 44 | Meroterpenes ( <b>125-<br/>126</b> )                                       | New   |                                                                     | <i>Penicillium</i> sp. 303            | Sea water                        | China                                                  | MDA-MB-<br>435, HepG2,<br>HCT-116,<br>A549 | Moderate<br>cytotoxic<br>activity ( in<br>the range of<br>11-37 µg/mL) | Li et al.<br>2014a     |
|    | Bisdiketone<br>derivative ( <b>127</b> )                                   | New   |                                                                     | <i>Penicillium</i> sp. 303            | Sea water                        | China                                                  | MDA-MB-<br>435                             | 7.13 µM                                                                | Li et al.<br>2014a     |
| 45 | Ditryptophenaline<br>( <b>128</b> )                                        | known | Terrestrial/<br>Marine<br>cytotoxic                                 | Endophytic fungus<br>No-Gx-3a         | Mangrove<br>endophytic<br>fungus | South<br>China sea                                     | KB,<br>KBv200                              | 8.0 µM and<br>12.0µM                                                   | Yang et al.<br>2013b   |
| 46 | Compound ( <b>129</b> )                                                    | New   |                                                                     | <i>Phomopsis</i> sp. (No.<br>SK7RN3G1 | Mangrove<br>sediment             | Hainan,<br>China                                       | HEp-2 and<br>HepG2                         | 8 and 9 µg/mL                                                          | Yang et al.<br>2013c   |
| 47 | 2,3-didehydro-19α-<br>hydroxy-14-<br>epicochlioquinone<br>B ( <b>130</b> ) | New   |                                                                     | <i>Nigrospora</i> sp.<br>MA75         | <i>Pongamia<br/>pinnata</i>      | Guangxi<br>Zhuang<br>Autonomo<br>us Region<br>of China | MCF-7,<br>SW1990,<br>and<br>SMMC7721       | 4, 5, and 7<br>µg/mL                                                   | Shang et al.<br>2012   |

|    |                                                                                    |        |                                                     |                                    |                        |                           |                            |                                        |                     |
|----|------------------------------------------------------------------------------------|--------|-----------------------------------------------------|------------------------------------|------------------------|---------------------------|----------------------------|----------------------------------------|---------------------|
| 48 | 1,4-dihydroxy-7-methylanthracene-9,10-dione ( <b>131</b> )                         | known  |                                                     | Mangrove endophytic fungus No.5094 | Unidentified Mangroove | South China Sea           | KB, KBv200                 | LD <sub>50</sub> values of 5.5,10.2 μM | Yang et al. 2013d   |
| 49 | Scopararane I ( <b>132</b> )                                                       | New    |                                                     | <i>Eutypella</i> sp. FS46          | Marine sediment        | South China Sea           | MCF-7, NCI-H460 and SF-268 | 83.9, 13.5, 25.3 μg/ mL                | Liu et al. 2016     |
|    | Pseurotin A ( <b>133</b> ), Pseurotin D ( <b>134</b> )                             | known  | Terrestrial endophytic cytotoxic / Marine cytotoxic | <i>Aspergillus</i> sp. (BRF 030)   | Marine sediment        | Northeast coast of Brazil | HCT-116                    | 72.0, 85.0, 15.1 and 4.5 μM            | Saraiva et al. 2015 |
| 50 | Fumitremorgin C ( <b>135</b> ) and 12,13-dihydroxy Fumitremorgin C ( <b>136</b> ). | known  | Trrestrial Cytotoxic,/ Marine cytotoxic             | <i>Aspergillus</i> sp. (BRF 030)   | Marine sediment        | Northeast coast of Brazil | HCT-116                    | 72.0, 85.0, 15.1 and 4.5 μM            | Saraiva et al. 2015 |
| 51 | Tryptoquivaline T ( <b>137</b> )                                                   | New    |                                                     | <i>Neosartorya fischeri</i>        | Marine mud             | Hainan Province of China  | HL-60                      | 82.3 μM                                | Wu et al. 2015      |
|    | Tryptoquivaline U ( <b>138</b> )                                                   | New    |                                                     | <i>Neosartorya fischeri</i>        | Marine mud             | Hainan Province of China  | HL-60                      | 90.0 μM                                | Wu et al. 2015      |
|    | Fiscalin B ( <b>139</b> )                                                          | Known  | terrestrial no cytotoxic                            | <i>Neosartorya fischeri</i>        | Marine mud             | Hainan Province of China  | HL-60                      | 8.8 μM                                 | Wu et al. 2015      |
| 52 | Penipacid A ( <b>140</b> )                                                         | New    |                                                     | <i>Penicillium paneum</i> SD-44    | Marine sediment        | South China Sea           | RKO                        | 8.4 μM                                 | Li et al. 2013      |
|    | Penipacid E ( <b>141</b> )                                                         | New    |                                                     | <i>Penicillium paneum</i> SD-44    | Marine sediment        | South China Sea           | RKO                        | 9.7 μM                                 | Li et al. 2013      |
|    | Compound ( <b>142</b> )                                                            | known, | synthetic                                           | <i>Penicillium paneum</i> SD-44    | Marine sediment        | South China Sea           | HeLa                       | 6.6 μM                                 | Li et al. 2013      |
| 53 | Prenpenicillide ( <b>143</b> )                                                     | New    |                                                     | <i>Penicillium</i> sp. ZLN29       | Marine sediment        | Jiaozhou Bay of China     | HepG2                      | 9.9 μM                                 | Gao et al. 2013     |



|    |                                               |       |                                                                                              |                                         |                        |                             |                                                  |                                                 |                        |
|----|-----------------------------------------------|-------|----------------------------------------------------------------------------------------------|-----------------------------------------|------------------------|-----------------------------|--------------------------------------------------|-------------------------------------------------|------------------------|
|    | Penicillide (144)                             | Know  | Endophytic fungi<br>Pestalotiopsis sydowiana ,<br>Proteosome inhibitor ,<br>Marine cytotoxic | <i>Penicillium</i> sp.<br>ZLN29         | Marine sediment        | Jiaozhou Bay of China       | HepG2                                            | 9.7 $\mu$ M                                     | Gao et al. 2013        |
| 54 | Decumbenone C (145)                           | New   |                                                                                              | <i>Aspergillus sulphureus</i> KMM 4640  | Marine sediment        |                             | SK-MEL-5                                         | 0.9 $\mu$ M                                     | Zhuravleva et al. 2012 |
| 55 | 6-O-methyl-7-chloroaveratin (146)             | New   |                                                                                              | <i>Aspergillus</i> sp.<br>SCSIO F063    | Marine sediment        | South China Sea             | SF-268, MCF-7, and NCI-H460                      | 7.1, 6.6, and 7.4 $\mu$ M                       | Huang et al. 2012      |
| 56 | Scopararane D (147)                           | New   |                                                                                              | <i>Eutypella scoparia</i> FS26          | Marine sediment        | South China Sea             | MCF-7, NCI-H460, SF-268                          | IC <sub>50</sub> 25.6-46.0 $\mu$ M              | Sun et al. 2012        |
|    | Libertellenone A (148)<br>Diaporthein B (149) | Known | From <i>Eutypella scoparia</i> FS26                                                          | <i>Eutypella scoparia</i> FS26          | Marine sediment        | South China Sea             | MCF-7, NCI-H460, SF-268                          | IC <sub>50</sub> 4.4–20.0 $\mu$ M               | Sun et al. 2012        |
| 57 | Cytochalasin K (150),                         | known | Terrestrial mycotoxin/<br>marine cytotoxic                                                   | <i>Arthrinium arundinis</i><br>ZSDS1-F3 | <i>Phakellia fusca</i> | Xisha Islands of China      | K562, A549, Huh-7, H1975, HL60, HeLa, and MOLT-4 | 10.5 to 47.4 $\mu$ M                            | Wang et al. 2015       |
|    | 10-phenyl-[12]-cytochalasin Z16 (151)         | known | Endophytes no cytotoxicity /                                                                 | <i>Arthrinium arundinis</i><br>ZSDS1-F3 | <i>Phakellia fusca</i> | Xisha Islands of China      | K562, A549, Huh-7, H1975, HL60, HeLa, and MOLT-4 | 1.13 to 18.8 $\mu$ M                            | Wang et al. 2015       |
| 58 | Aszonapyrone A (152)                          | known | Terrestrial / Marine cytotoxic                                                               | <i>Neosartorya fischeri</i> (KUFC 6344) | Coastal forest soil    | Chonburi Province, Thailand | MCF-7 NCI-H460 and A375-C5                       | GI <sub>50</sub> = 13.6, 11.6 and 10.2 $\mu$ M. | Eamvijarn et al. 2013  |

|    |                                                       |                   |                       |                                         |                                                  |                             |                                                    |                                                |                       |
|----|-------------------------------------------------------|-------------------|-----------------------|-----------------------------------------|--------------------------------------------------|-----------------------------|----------------------------------------------------|------------------------------------------------|-----------------------|
|    | 13-oxofomitremorgin B (153)                           | known             | Terrestrial Cytotoxic | <i>Neosartorya fischeri</i> (KUFC 6344) | Coastal forest soil                              | Chonburi Province, Thailand | MCF-7 NCI-H460 and A375-C5                         | GI <sub>50</sub> = 115.0, 123.31 and 68.6 μM,  | Eamvijarn et al. 2013 |
|    | Sartorypyrone A (154)                                 | known             | Marine/cytotoxic      | <i>Neosartorya fischeri</i> (KUFC 6344) | Coastal forest soil                              | Chonburi Province, Thailand | A375-C5, MCF-7 NCI-H460                            | GI <sub>50</sub> =21.5, 46.3 and 37.3 μM       | Eamvijarn et al. 2013 |
|    | Sartorypyrone B (155)                                 | known             | Marine/cytotoxic      | <i>Neosartorya fischeri</i> (KUFC 6344) | Coastal forest soil                              | Chonburi Province, Thailand | MCF-7 NCI-H460 and A375-C5                         | GI <sub>50</sub> =17.8 μM, 20.5 μM and 25.0 μM | Eamvijarn et al. 2013 |
| 59 | Disydonol A (156)                                     | New               |                       | <i>Aspergillus</i> sp.                  | <i>Xestospongia testudinaria</i>                 | South China Sea             | HepG-2 and Caski cancer                            | 9.31 and 12.40 μg/mL                           | Sun et al 2012        |
|    | Disydonol C (157)                                     | New               |                       | <i>Aspergillus</i> sp.                  | <i>Xestospongia testudinaria</i>                 | South China Sea             | HepG-2 and Caski cancer                            | 2.91 and 10.20 μg/mL                           | Sun et al 2012        |
| 60 | Xestospongiamide (158)                                | New               |                       | <i>Xestospongia</i> sp.                 | Red Sea sponge <i>Xestospongia</i> sp            | Jeddah, Saudi Arabia        | Ehrlich ascites carcinoma and lymphocytic leukemia | 5.0 μM                                         | Ayyad et al. 2015     |
| 61 | Marilines A1, A2 (159, 160)                           | New               |                       | <i>Stachylidium</i> sp.                 | Sponge <i>Callyspongia</i> cf. <i>C. flammea</i> | NA                          | HLE                                                | 0.86 μM                                        | Almeida et al. 2012   |
| 62 | 4-(3-Hydroxyphenyl)-3-methoxyquinolin-2(1H)-one (161) | New               |                       | <i>Aspergillus versicolor</i> Y31-2     | Seawater samples                                 | Indian Ocean                | MCF-7, SMMC-7721                                   | 16.6 and 18.2 μM                               | Li et al. 2016d       |
| 63 | Penicilazaphilone B (162)                             | New               |                       | <i>Penicillium sclerotiorum</i> M-22    | Rotted leaf sample                               | Hainan province, China      | B-16                                               | 0.29, 0.44 and                                 | Zhou et al. 2016      |
|    | Penicilazaphilone C (163)                             | New               |                       | <i>Penicillium sclerotiorum</i> M-22    | Rotted leaf sample                               | Hainan province, China      | SGC-7901                                           | 0.06, 0.72 μM                                  | Zhou et al. 2016      |
| 64 | 5-hydroxymethyl-2-furancarboxaldehyde (164)           | known Terrestrial |                       | <i>Penicillium chrysogenum</i> HGQ6     | Mud sample                                       | Lianyungang sea             | BGC823                                             | 0.19 μg/mL                                     | Guo et al. 2016       |

|    |                                    |     |  |                                       |                                |                                                                           |                          |                                 |                 |
|----|------------------------------------|-----|--|---------------------------------------|--------------------------------|---------------------------------------------------------------------------|--------------------------|---------------------------------|-----------------|
| 65 | Epiremisorpine B<br><b>(165)</b>   | New |  | <i>Penicillium purpurogenum</i> G59   | Soil sample                    | Tideland of Bohai Bay around Lüjühe in Tanggu district of Tianjin, China, | K562, HL-60HL-60         | 69.0 and 62.9 µg/mL             | Xia et al. 2015 |
|    | Epiremisorpine B1<br><b>(166)</b>  | New |  | <i>Penicillium purpurogenum</i> G59   | Soil sample                    | Tideland of Bohai Bay around Lüjühe in Tanggu district of Tianjin, China, | K562, HL-60HL-60         | 53.1 and 54.7 µg/mL             | Xia et al. 2015 |
|    | Isoconiochaetone C<br><b>(167)</b> | New |  | <i>Penicillium purpurogenum</i> G59   | Soil sample                    | Tideland of Bohai Bay around Lüjühe in Tanggu district of Tianjin, China, | K562, HL-60HL-60         | IR% 20.4 and 26.0 at 100 µg/ mL | Xia et al. 2015 |
| 66 | Penicitrinine A<br><b>(168)</b>    | New |  | <i>Penicillium citrinum</i>           | Marine-derived                 | Langqi Island, Fujian, China.                                             | A-375, SPC-A1 and HGC-27 | 20.12 µM, 28.67 µM and 29.49 µM | Liu et al. 2015 |
| 67 | Aspochalasin V<br><b>(169)</b>     | New |  | <i>Aspergillus</i> sp                 | <i>Ligia oceanica</i>          | Zhejiang Province of China                                                | PC3 and HCT116           | 30.4 and 39.2 µM                | Liu et al. 2014 |
| 68 | Asperterrestide A<br><b>(170)</b>  | New |  | <i>Aspergillus terreus</i> SCSGAF0162 | <i>Echinogorgia aurantiaca</i> | Hainan Province, China                                                    | U937 and MOLT4           | 6.4 and 6.2 µM                  | He et al. 2013  |

|    |                            |       |                                                 |                                     |                       |                                                                            |                   |                                                    |                   |
|----|----------------------------|-------|-------------------------------------------------|-------------------------------------|-----------------------|----------------------------------------------------------------------------|-------------------|----------------------------------------------------|-------------------|
| 69 | Aculeatusquinone B (171)   | New   |                                                 | <i>Aspergillus aculeatus</i>        | Coral Reef            | Similan Island, Phang Nga Province Thailand                                | HL-60, K562, A549 | 5.4-76.1 $\mu$ M                                   | Chen et al. 2013  |
|    | Aculeatusquinone D (172)   | New   |                                                 | <i>Aspergillus aculeatus</i>        | Coral Reef            | Similan Island, Phang Nga Province Thailand                                | HL-60, K562, A549 | 5.4-76.1 $\mu$ M                                   | Chen et al. 2013  |
| 70 | Diorcinol D (173)          | New   |                                                 | <i>Aspergillus versicolor</i>       | Mud sample            | Yellow Sea                                                                 | HeLa, K562        | 31.5 and 48.9 $\mu$ M                              | Gao et al. 2013   |
|    | Diorcinol E (174)          | New   |                                                 | <i>Aspergillus versicolor</i>       | Mud sample            | Yellow Sea                                                                 | HeLa              | 36.5 $\mu$ M                                       | Gao et al. 2013   |
| 71 | Chaunolidone A (175)       | New   |                                                 | <i>Chaunopycnis</i> sp. (CMB-MF028) | <i>Siphonaria</i> sp. | Shorncliffe, Queensland                                                    | NCI-H460          | 0.09 $\mu$ M                                       | Shang et al. 2015 |
| 72 | Penicimutalidine (176)     | New   |                                                 | <i>Penicillium purpurogenum</i> G59 | Soil sample           | Tideland of Bohai Bay around Ljüjühe in Tanggu district of Tianjin, China, | HL-60             | 95.2 $\mu$ g/ mL, IR ( %) value 20.8% at 100 mg/ml | Li et al 2016e    |
|    | Oxaphenalenone-SF226 (177) | known | Terrestrial parasitic fungus / Cytotoxic marine | <i>Penicillium purpurogenum</i> G59 | Soil sample           | Tideland of Bohai Bay around Ljüjühe in Tanggu district of Tianjin, China, | K562              | 14.0 $\mu$ g/ mL IR ( %) 28.1% at 100 $\mu$ g/ml   | Li et al 2016e    |

|    |                                                                             |       |                               |                                           |                                             |                                                                           |                    |                            |                   |
|----|-----------------------------------------------------------------------------|-------|-------------------------------|-------------------------------------------|---------------------------------------------|---------------------------------------------------------------------------|--------------------|----------------------------|-------------------|
| 73 | Penicimutide ( <b>178</b> )                                                 | New   |                               | <i>Penicillium purpurogenum</i> G59       | Soil sample                                 | Tideland of Bohai Bay around Lüjühe in Tanggu district of Tianjin, China, | HeLa               | IR ( %) 39.4% at 100 mg/ml | Wang et al. 2016  |
| 74 | Oxalicumone A ( <b>179</b> )                                                | New   |                               | <i>Penicillium oxalicum</i> SCSGAF 0023   | Gorgonian <i>Muricella flexuosa</i>         | South China Sea                                                           | A375 and SW-620    | 11.7 and 22.6 $\mu$ M      | Sun et al. 2013   |
| 75 | Indole alkaloid ( <b>180</b> )                                              | known | Synthetic no cytotoxic        | <i>Aspergillus sydowii</i> SCSIO 00305    | <i>Verrucella umbraculum</i>                | Sanya, Hainan Province, China                                             | A375               | 5.7 $\mu$ M                | He et al. 2012    |
| 76 | AGI-B4 ( <b>181</b> )                                                       | known | Terrestrial/ Cytotoxic marine | <i>Neosartorya fischeri</i> strain 1008F1 | Marine-derived                              | Not Reported                                                              | SGC-7901, BEL-7404 | 0.29 $\mu$ M, 0.31 $\mu$ M | Tan et al. 2012   |
| 77 | Chondrosterin J ( <b>182</b> )                                              | new   |                               | <i>Chondrostereum</i> sp                  | <i>Sarcophyton tortuosum</i>                | Hainan Sanya National Coral Reef Reserve, China                           | CNE-1 and 2        | 1.32 and 0.56 $\mu$ M      | Li et al. 2014    |
| 78 | (+)-6- <i>O</i> -demethylpestalotiopsin A and C ( <b>183</b> , <b>184</b> ) | new   |                               | <i>Ascotricha</i> sp. ZJ-M-5              | Mud sample                                  | Zhejiang Province, China                                                  | HL-60 and K562     | 6.9 and 12.3 $\mu$ M       | Wang et al. 2014a |
| 79 | Pimarane diterpene ( <b>185</b> )                                           | new   |                               | Fungal strain HS-1                        | Sea cucumber, <i>Apostichopus japonicus</i> | Shandong Province, China                                                  | KB and KBv200      | 3.51, 2.34 $\mu$ g/mL,     | Xia et al. 2012   |
|    | Pimarane diterpene ( <b>186</b> )                                           | new   |                               | Fungal strain HS-1                        | Sea cucumber, <i>Apostichopus japonicus</i> | Shandong Province, China                                                  | KB and KBv200      | 20.74, 14.47 $\mu$ g/mL,   | Xia et al. 2012   |

|    |                                        |       |                                          |                                     |                                                                      |                                                                            |                                      |                                               |                              |
|----|----------------------------------------|-------|------------------------------------------|-------------------------------------|----------------------------------------------------------------------|----------------------------------------------------------------------------|--------------------------------------|-----------------------------------------------|------------------------------|
|    | Diaporthins B ( <b>187</b> )           | known | Terrestrial mycotoxin / Marine cytotoxic | Fungal strain HS-1                  | Sea cucumber, <i>Apostichopus japonicus</i>                          | Shandong Province, China                                                   | KB and KBv200                        | and 3.86, 6.52 $\mu\text{g/mL}$               | Xia et al. 2012              |
| 80 | Trichodermamides B ( <b>188</b> ).     | known | Marine/cytotoxic                         | <i>Trichoderma virens</i>           | Ascidian <i>Didemnum molle</i> and a green alga, <i>Halimeda</i> sp. | Papua New Guinea                                                           | HeLa                                 | 1.4-21 $\mu\text{M}$                          | Jans et al. 2017             |
| 81 | Chromosulfine ( <b>189</b> ),          | New   |                                          | <i>Penicillium purpurogenum</i> G59 | Soil sample                                                          | Tideland of Bohai Bay around Ljüjühe in Tanggu district of Tianjin, China, | K562, HL-60, BGC-823, HeLa and MCF-7 | 60.8, 16.7, 73.8, 75.4 and 59.2 $\mu\text{M}$ | Yi et al. 2016               |
| 82 | Neohydroxyaspergillilic ( <b>190</b> ) | known | Terrestrial/ Cytotoxic marine            | Fungus strain CF07002               | Marine sediment                                                      | Eastern Pacific Ocean off Panama                                           | Jurkat                               | 60.2 $\mu\text{M}$                            | Cardoso-Martinez et al. 2015 |
|    | Neospergillilic acid ( <b>191</b> )    | known | Terrestrial mycotoxin / Marine cytotoxic | Fungus strain CF07002               | Marine sediment                                                      | Eastern Pacific Ocean off Panama                                           | Jurkat, K562, U937, and Raji         | 31.6, 50.1, 42.6, and 54.9 $\mu\text{M}$      | Cardoso-Martinez et al. 2015 |
| 83 | Aspergiolide A ( <b>192</b> )          | New   |                                          | <i>Aspergillus glaucus</i>          | Marine sediment around the mangrove roots                            | Fujian province of the People's Republic of China.                         | BEL-7402                             | Targeting topoisomerase II                    | Wang et al. 2014b            |

|     |                                                          |       |                                         |                                          |                                                   |                                            |                                                          |                                                                                                                                          |                  |
|-----|----------------------------------------------------------|-------|-----------------------------------------|------------------------------------------|---------------------------------------------------|--------------------------------------------|----------------------------------------------------------|------------------------------------------------------------------------------------------------------------------------------------------|------------------|
| 84  | Isosclerone (193)                                        | Known | Terrestrial than marine                 | <i>Aspergillus fumigatus</i>             | Marine green algae                                | Seosaeng-myeon, Ulsan in Republic of Korea | MCF-7                                                    | IC <sub>50</sub> value 63 $\mu$ M Also inhibits the protein and gene expressions of MMP-2,-9 in MCF-7 by altering MAPK signaling pathway | Li et al. 2014   |
| 851 | Oxalicumone E (194)                                      | New   |                                         | <i>Penicillium oxalicum</i> SCSGAF 0023. | Gorgonian <i>Muricella flexuosa</i>               | South China Sea                            | H1975, U937, K562, BGC823, MOLT-4, MCF-7, HL60 and Huh-7 | < 10 $\mu$ M                                                                                                                             | Bao et al. 2014  |
|     | Oxalicumone A (195)                                      | known | Marine/cytotoxic                        | <i>Penicillium oxalicum</i> SCSGAF 0023. | Gorgonian <i>Muricella flexuosa</i>               | South China Sea                            | H1975, U937, K562, BGC823, MOLT-4, MCF-7, HL60 and Huh-7 | < 10 $\mu$ M                                                                                                                             | Bao et al. 2014  |
| 86  | Deoxybostrycin (196)                                     | Known | Endophytes cytotoxic / Marine cytotoxic | <i>Nigrospora</i> sp. No. 1403           | <i>Kandelia candel</i> Mangrove endophytic fungus | South China Sea                            | MDA-MB-435, HepG2 and HCT-116                            | 3.19 , 29.99 and 5.69 $\mu$ M.                                                                                                           | Chen et al. 2012 |
| 87  | Auranomide A (197) Auranomide B (198) Auranomide C (199) | New   |                                         | <i>Penicillium aurantiogriseum</i>       | marine mud                                        | Bohai Sea                                  | K562 , ACHN, HEPG2 and A549                              | Moderate cytotoxic (Inhibition rate at 100 $\mu$ g/mL) 5.8-20.48                                                                         | Song et al. 2012 |
